# Supplementary material
Source: PubMed Central journal article supplement (PMC2634882)
Supplement: 0811410106_Appendix_PDF.pdf [file 0811410106_Appendix_PDF.pdf]

## SI Appendix

## CellulaRhythm Code for Tecan Luminometer

```
#####
#####
# CellulaRhythm 6.T      for R 2.3.1/2.4.0/2.5.0
# read, fit, and plot circadian data
# Tecan format 384
# Warren G. Lewis      February 2008
#####
#####
#linear detrended exponential damped cosine
#with linear parameter estimates
#####
#####
#For further info, check out R project online at http://www.r-project.org/
#####
#####
# delete all text above Cycle Number 1 2 3 4 ...
# then save the Tecan output file as Text (tab delimited) from
Microsoft Excel
# change the red text to match your file and folder names
# change the red numbers to set values for interval and end of run
# be careful not to change the quotes, or other parts of the program
#####
#####
method<-"lincosdamp"

# name of tab-delimited text data file
filename<-"filename.txt"

# heatmap limit in # of points
STOP<-54

# last point included in curve fitting (nls)
END<-54

# wells in plate (384 or 96)
plate.wells<-384

# interval in hours (Tecan gives time in seconds--divide by 3600 to
get hours)
interval=1.66666
totaltime<-interval*END
totaltime

# make a new folder for each analysis
# set the working directory to match the data folder
setwd("D:/folder")
getwd()

# screen date, along with a short description of the experiment
screendate<-"description"

image.size<-450
pdf.long<-11
pdf.short<-8.5

# first row of luminescence data in text file
row.first<-4
row.last<-(row.first+plate.wells-1)
```

```

# number of points you consider to be the acute induction part of the
data
drop.points<-12
startpoint<-(drop.points+1)
clippoint<-(2+startpoint)
halfpoint<-trunc((END-drop.points)/2)

period.est<-24
damp.est<-0.005
large.size<-1200
databins<-100
damp.limit<-0.1
amp.limit<-10
squares.limit<-30000000

ifelse(plate.wells==384, Wells<-
c("P24", "P23", "P22", "P21", "P20", "P19", "P18", "P17", "P16", "P15", "P14", "P1
3", "P12", "P11", "P10", "P09", "P08", "P07", "P06", "P05", "P04", "P03", "P02", "P
01",
"O24", "O23", "O22", "O21", "O20", "O19", "O18", "O17", "O16", "O15", "O14", "O13",
"O12", "O11", "O10", "O09", "O08", "O07", "O06", "O05", "O04", "O03", "O02", "O01",
",
"N24", "N23", "N22", "N21", "N20", "N19", "N18", "N17", "N16", "N15", "N14", "N13",
", "N12", "N11", "N10", "N09", "N08", "N07", "N06", "N05", "N04", "N03", "N02", "N01",
",
"M24", "M23", "M22", "M21", "M20", "M19", "M18", "M17", "M16", "M15", "M14", "M13",
", "M12", "M11", "M10", "M09", "M08", "M07", "M06", "M05", "M04", "M03", "M02", "M01",
",
"L24", "L23", "L22", "L21", "L20", "L19", "L18", "L17", "L16", "L15", "L14", "L13",
", "L12", "L11", "L10", "L09", "L08", "L07", "L06", "L05", "L04", "L03", "L02", "L01",
",
"K24", "K23", "K22", "K21", "K20", "K19", "K18", "K17", "K16", "K15", "K14", "K13",
", "K12", "K11", "K10", "K09", "K08", "K07", "K06", "K05", "K04", "K03", "K02", "K01",
",
"J24", "J23", "J22", "J21", "J20", "J19", "J18", "J17", "J16", "J15", "J14", "J13",
", "J12", "J11", "J10", "J09", "J08", "J07", "J06", "J05", "J04", "J03", "J02", "J01",
",
"I24", "I23", "I22", "I21", "I20", "I19", "I18", "I17", "I16", "I15", "I14", "I13",
", "I12", "I11", "I10", "I09", "I08", "I07", "I06", "I05", "I04", "I03", "I02", "I01",
",
"H24", "H23", "H22", "H21", "H20", "H19", "H18", "H17", "H16", "H15", "H14", "H13",
", "H12", "H11", "H10", "H09", "H08", "H07", "H06", "H05", "H04", "H03", "H02", "H01",
",
"G24", "G23", "G22", "G21", "G20", "G19", "G18", "G17", "G16", "G15", "G14", "G13",
", "G12", "G11", "G10", "G09", "G08", "G07", "G06", "G05", "G04", "G03", "G02", "G01",
",
"F24", "F23", "F22", "F21", "F20", "F19", "F18", "F17", "F16", "F15", "F14", "F13",
", "F12", "F11", "F10", "F09", "F08", "F07", "F06", "F05", "F04", "F03", "F02", "F01",
",
"E24", "E23", "E22", "E21", "E20", "E19", "E18", "E17", "E16", "E15", "E14", "E13",
", "E12", "E11", "E10", "E09", "E08", "E07", "E06", "E05", "E04", "E03", "E02", "E01",
",
"D24", "D23", "D22", "D21", "D20", "D19", "D18", "D17", "D16", "D15", "D14", "D13",
", "D12", "D11", "D10", "D09", "D08", "D07", "D06", "D05", "D04", "D03", "D02", "D01",
",
"C24", "C23", "C22", "C21", "C20", "C19", "C18", "C17", "C16", "C15", "C14", "C13",
", "C12", "C11", "C10", "C09", "C08", "C07", "C06", "C05", "C04", "C03", "C02", "C01",
",
"B24", "B23", "B22", "B21", "B20", "B19", "B18", "B17", "B16", "B15", "B14", "B13",
", "B12", "B11", "B10", "B09", "B08", "B07", "B06", "B05", "B04", "B03", "B02", "B01",
",
"A24", "A23", "A22", "A21", "A20", "A19", "A18", "A17", "A16", "A15", "A14", "A13",
", "A12", "A11", "A10", "A09", "A08", "A07", "A06", "A05", "A04", "A03", "A02", "A01

```

```

"),
Wells<-
c("H12", "H11", "H10", "H09", "H08", "H07", "H06", "H05", "H04", "H03", "H02", "H01",
"G12", "G11", "G10", "G09", "G08", "G07", "G06", "G05", "G04", "G03", "G02", "G01",
'F12', "F11", "F10", "F09", "F08", "F07", "F06", "F05", "F04", "F03", "F02", "F01",
'
'E12', "E11", "E10", "E09", "E08", "E07", "E06", "E05", "E04", "E03", "E02", "E01",
'D12', "D11", "D10", "D09", "D08", "D07", "D06", "D05", "D04", "D03", "D02", "D01",
'C12', "C11", "C10", "C09", "C08", "C07", "C06", "C05", "C04", "C03", "C02", "C01",
'B12', "B11", "B10", "B09", "B08", "B07", "B06", "B05", "B04", "B03", "B02", "B01",
'A12', "A11", "A10", "A09", "A08", "A07", "A06", "A05", "A04", "A03", "A02", "A01"
))

WellsA1<-c(sort(Wells), "time(hours)")

Tecandata<-read.table(filename, header=FALSE, skip=(row.first-1),
fill=TRUE, row.names=1)

newdrop<-1
PLATE<-as.matrix((Tecandata[1:(plate.wells),newdrop:STOP]))

#####
# check the data import, if there are errors, using the fix command
# >fix(PLATE)

integertimes<-(newdrop:STOP)

measurementtimes<-integertimes*interval
# if you want to define your own measurement times
# (e.g. there are uneven intervals)
# insert your own measurementtimes, using
# measurementsec<-c(0,3600,7200,10000)
# you can make that list of times by saving your excel file as a csv
file
# and pasting it between the parentheses above
# measurementtimes<-measurementsec/3600

PLATEwtime<-rbind(PLATE[1:plate.wells,],measurementtimes)
write.table(PLATEwtime,paste("screendata",filename), sep=",",
quote=FALSE, col.names=FALSE, row.names=FALSE)
READY<-read.table(paste("screendata",filename), sep=",", header=FALSE,
skip=0, row.names=WellsA1, fill=FALSE)
WellsA1<-row.names(READY)
attach(READY)
x<-unlist(READY[(plate.wells+1),startpoint:END])
clipx<- x[clippoint:(END-startpoint)]

grayscale<-colorRampPalette(c(gray(0), gray(1)))
normcolor<-grayscale(64)
hotset<-colorRampPalette(c("black","blue", "green", "yellow", "orange",
"red"))
nonnormcolor<-hotset(128)

beginwell<-(1)
endwell<-(plate.wells)
png(paste(screendate,"normal.png", sep=""), width=large.size,
height=large.size)
heatmap(as.matrix(READY), Colv = NA, Rowv=NA, scale="row",main =

```

```

paste(screendate,"norm","          time ->"),labRow = NULL, labCol = NULL,
xlab = NULL , ylab = NULL, col = normcolor, margin=c(1,0))
dev.off()
png(paste(screendate,"raw.png", sep=""), width=large.size,
height=large.size)
heatmap(as.matrix(READY), Colv = NA, Rowv=NA, scale="none",main =
paste(screendate,"raw","          time ->"),labRow = NULL, labCol = NULL,
xlab = NULL , ylab = NULL, col = nonnormcolor, margin=c(1,0))
dev.off()

pdf(paste("RAW", screendate,".pdf"), width=11, height=8.5)
RAW<-heatmap(as.matrix(READY[1:plate.wells,1:END]), Colv = NA, Rowv=NA,
scale="none",main =
paste("RAW", screendate,"time ->"),labRow = NULL, labCol = NULL, xlab =
NULL , ylab =
NULL, col = nonnormcolor, margin=c(3,3))
dev.off()

pdf(paste("RAW1", screendate,".pdf"), width=11, height=8.5)
RAW<-heatmap(as.matrix(READY[1:96,1:END]), Colv = NA, Rowv=NA,
scale="none",main =
paste("RAW1", screendate,"time ->"),labRow = NULL, labCol = NULL, xlab
= NULL , ylab =
NULL, col = nonnormcolor, margin=c(3,3))
dev.off()
pdf(paste("RAW2", screendate,".pdf"), width=11, height=8.5)
RAW<-heatmap(as.matrix(READY[97:192,1:END]), Colv = NA, Rowv=NA,
scale="none",main =
paste("RAW2", screendate,"time ->"),labRow = NULL, labCol = NULL, xlab
= NULL , ylab =
NULL, col = nonnormcolor, margin=c(3,3))
dev.off()
pdf(paste("RAW3", screendate,".pdf"), width=11, height=8.5)
RAW<-heatmap(as.matrix(READY[193:288,1:END]), Colv = NA, Rowv=NA,
scale="none",main =
paste("RAW3", screendate,"time ->"),labRow = NULL, labCol = NULL, xlab
= NULL , ylab =
NULL, col = nonnormcolor, margin=c(3,3))
dev.off()
pdf(paste("RAW4", screendate,".pdf"), width=11, height=8.5)
RAW<-heatmap(as.matrix(READY[289:384,1:END]), Colv = NA, Rowv=NA,
scale="none",main =
paste("RAW4", screendate,"time ->"),labRow = NULL, labCol = NULL, xlab
= NULL , ylab =
NULL, col = nonnormcolor, margin=c(3,3))
dev.off()

pdf(paste("RAWclust", screendate,".pdf"), width=11, height=8.5)
RAW<-heatmap(as.matrix(READY[1:384,1:END]), Colv = NA, Rowv=TRUE,
scale="none",main =
paste("RAW", screendate,"time ->"),labRow = NULL, labCol = NULL,
cexRow=0.2, xlab = "timepoints" , ylab =
NULL, col = nonnormcolor, margin=c(3,3))
dev.off()

pdf(paste("NORMAL", screendate,".pdf"), width=11, height=8.5)
NORM<-heatmap(as.matrix(READY), Colv = NA, Rowv=NA, scale="row",main =
paste("time ->"),labRow = NULL, labCol = NULL, xlab = NULL , ylab =
NULL, col = normcolor, margin=c(2,2))
dev.off()

pdf(paste("NORM1", screendate,".pdf"), width=11, height=8.5)
RAW<-heatmap(as.matrix(READY[1:96,1:END]), Colv = NA, Rowv=NA,
scale="row",main =

```

```

paste("RAW1", screendate,"time ->"),labRow = NULL, labCol = NULL, xlab
= NULL , ylab =
NULL, col = normcolor, margin=c(3,3))
dev.off()
pdf(paste("NORM2", screendate,".pdf"), width=11, height=8.5)
RAW<-heatmap(as.matrix(READY[97:192,1:END]), Colv = NA, Rowv=NA,
scale="row",main =
paste("RAW2", screendate,"time ->"),labRow = NULL, labCol = NULL, xlab
= NULL , ylab =
NULL, col = normcolor, margin=c(3,3))
dev.off()
pdf(paste("NORM3", screendate,".pdf"), width=11, height=8.5)
RAW<-heatmap(as.matrix(READY[193:288,1:END]), Colv = NA, Rowv=NA,
scale="row",main =
paste("RAW3", screendate,"time ->"),labRow = NULL, labCol = NULL, xlab
= NULL , ylab =
NULL, col = normcolor, margin=c(3,3))
dev.off()
pdf(paste("NORM4", screendate,".pdf"), width=11, height=8.5)
RAW<-heatmap(as.matrix(READY[289:384,1:END]), Colv = NA, Rowv=NA,
scale="row",main =
paste("RAW4", screendate,"time ->"),labRow = NULL, labCol = NULL, xlab
= NULL , ylab =
NULL, col = normcolor, margin=c(3,3))
dev.off()

png(paste("RAW1", screendate,".png"), width=large.size,
height=large.size)
RAW<-heatmap(as.matrix(READY[1:96,1:END]), Colv = NA, Rowv=NA,
scale="none",main =
paste("RAW1", screendate,"time ->"),labRow = NULL, labCol = NULL, xlab
= NULL , ylab =
NULL, col = nonnormcolor, margin=c(3,3))
dev.off()
png(paste("RAW2", screendate,".png"), width=large.size,
height=large.size)
RAW<-heatmap(as.matrix(READY[97:192,1:END]), Colv = NA, Rowv=NA,
scale="none",main =
paste("RAW2", screendate,"time ->"),labRow = NULL, labCol = NULL, xlab
= NULL , ylab =
NULL, col = nonnormcolor, margin=c(3,3))
dev.off()
png(paste("RAW3", screendate,".png"), width=large.size,
height=large.size)
RAW<-heatmap(as.matrix(READY[193:288,1:END]), Colv = NA, Rowv=NA,
scale="none",main =
paste("RAW3", screendate,"time ->"),labRow = NULL, labCol = NULL, xlab
= NULL , ylab =
NULL, col = nonnormcolor, margin=c(3,3))
dev.off()
png(paste("RAW4", screendate,".png"), width=large.size,
height=large.size)
RAW<-heatmap(as.matrix(READY[289:384,1:END]), Colv = NA, Rowv=NA,
scale="none",main =
paste("RAW4", screendate,"time ->"),labRow = NULL, labCol = NULL, xlab
= NULL , ylab =
NULL, col = nonnormcolor, margin=c(3,3))
dev.off()

png(paste("RAWclust", screendate,".png"), width=large.size,
height=large.size)
RAW<-heatmap(as.matrix(READY[1:384,1:END]), Colv = NA, Rowv=TRUE,
scale="none",main =
paste("RAW", screendate,"time ->"),labRow = NULL, labCol = NULL,

```

```

cexRow=0.2, xlab = "timepoints" , ylab =
NULL, col = nonnormcolor, margin=c(3,3))
dev.off()

png(paste("NORMAL", screendate, ".png"), width=large.size,
height=large.size)
NORM<-heatmap(as.matrix(READY), Colv = NA, Rowv=NA, scale="row",main =
paste("time ->"),labRow = NULL, labCol = NULL, xlab = NULL , ylab =
NULL, col = normcolor, margin=c(2,2))
dev.off()

png(paste("NORM1", screendate, ".png"), width=large.size,
height=large.size)
RAW<-heatmap(as.matrix(READY[1:96,1:END]), Colv = NA, Rowv=NA,
scale="row",main =
paste("NORM1", screendate, "time ->"),labRow = NULL, labCol = NULL, xlab
= NULL , ylab =
NULL, col = normcolor, margin=c(3,3))
dev.off()
png(paste("NORM2", screendate, ".png"), width=large.size,
height=large.size)
RAW<-heatmap(as.matrix(READY[97:192,1:END]), Colv = NA, Rowv=NA,
scale="row",main =
paste("NORM2", screendate, "time ->"),labRow = NULL, labCol = NULL, xlab
= NULL , ylab =
NULL, col = normcolor, margin=c(3,3))
dev.off()
png(paste("NORM3", screendate, ".png"), width=large.size,
height=large.size)
RAW<-heatmap(as.matrix(READY[193:288,1:END]), Colv = NA, Rowv=NA,
scale="row",main =
paste("NORM3", screendate, "time ->"),labRow = NULL, labCol = NULL, xlab
= NULL , ylab =
NULL, col = normcolor, margin=c(3,3))
dev.off()
png(paste("NORM4", screendate, ".png"), width=large.size,
height=large.size)
RAW<-heatmap(as.matrix(READY[289:384,1:END]), Colv = NA, Rowv=NA,
scale="row",main =
paste("NORM4", screendate, "time ->"),labRow = NULL, labCol = NULL, xlab
= NULL , ylab =
NULL, col = normcolor, margin=c(3,3))
dev.off()

pdf(paste("ALT", screendate, ".pdf"), width=11, height=8.5)
heatmap(as.matrix(READY), Colv = NA, Rowv=NA, scale="none",main =
paste("time ->"),labRow = NULL, labCol = NULL, xlab = NULL , ylab =
NULL, col = nonnormcolor, margin=c(2,2))
dev.off()

#####
#nonlinear least squares curvefitting
lincosdampdata<-matrix(nrow=plate.wells,ncol=10)
colnames(lincosdampdata)<-
c("well", "baseline", "amplitude", "dampingrate", "phase", "period", "phase.a
ngle", "sumsquares", "slope", "Relamp")
ss.residuals<-numeric()
for (i in 1:plate.wells)
{png(paste(screendate,WellsA1[i], ".png"), width=image.size,
height=image.size)
roe<-unlist(READY[i, startpoint:END])
cliproe<-unlist(roe[clippoint:(END-startpoint)])
trend.est<-((median(roe[startpoint:halfpoint])-
median(roe[halfpoint:(END-startpoint)])))/(x[halfpoint]-x[END-

```

```

startpoint]))
phase.est<-clipx[which.max(cliproe)]
baseline.est<-median(cliproe)
amp.est<-((max(cliproe)-min(cliproe))/2)
plot(roe~x, xlab="Time (h)", ylab="Luminescence", pch = 1, cex=2)
lincosdamp<- try(nls(roe~ baseline + amplitude*(exp(-
damp*x))*cos(2*pi*(x-phase)/period) + trend*x,
start=list(baseline=baseline.est, amplitude=amp.est, damp= damp.est,
phase=phase.est, period=period.est, trend=trend.est),
trace=TRUE, algorithm="port"),silent=TRUE
)
lines(x, fitted.values(lincosdamp), lwd=3)
title(WellsA1[i])
try(ss.residuals<-sum((residuals(lincosdamp))^2))
try(baseline<-summary(lincosdamp)$coef[1])
try(amplitude<-summary(lincosdamp)$coef[2])
try(dampingrate<-summary(lincosdamp)$coef[3])
try(phase<-summary(lincosdamp)$coef[4])
try(period<-summary(lincosdamp)$coef[5])
try(phase.angle<-(-2*pi*((period-phase)/period-trunc((period-
phase)/period))))
try(phase<-format(phase, digits=3))
try(period<-format(period, digits=4))
try(text(55, max(roe), paste("period=",period,"h"), cex=0.8))
try(trend<-summary(lincosdamp)$coef[6])
thewell<-WellsA1[i]
Relamp<-NA
try(lincosdampdata[i,]<-
cbind(thewell,baseline,amplitude,dampingrate,phase,period,phase.angle,s
s.residuals,trend,Relamp))
dev.off()
}

write.table(lincosdampdata,paste("Parameters",screendate,".txt",
sep=""), sep="," , quote=FALSE, row.names=FALSE)

detach(READY)

save.image(paste(getwd(),"/run.RData", sep=""))

###STOP HERE

```

## CellulaRhythm Code for VieLux System

```
#####
# CellulaRhythm 4.V384      for R 2.4.0
# read, fit, and plot circadian data
# 384 VieLux format
# Warren G. Lewis      October, 2007
#####
#linear detrended exponential damped cosine
#with linear parameter estimates
method<-"lincosdamp"

screendate<-"description"

#number of traces in a file—e.g. 384 or 1536
plate.wells<-384

large.size<-2000
databins<-100
damp.limit<-0.1
amp.limit<-10
squares.limit<-30000000
image.size<-2000

row.first<-103
row.last<-(row.first+plate.wells-1)
drop.points<-10
startpoint<-(drop.points+1)
clippoint<-(3+startpoint)

period.est<-24
damp.est<-0.005

#name of folder the data is in
setwd("D:/folder")

Wells<-as.matrix(read.table(paste("./well",plate.wells,".txt",
sep="")))

myfilelist<-list.files(pattern="G")
myfileinfo<-file.info(myfilelist)
myfilenames<-row.names(myfileinfo)

##Determines number of files in folder
##the only text files should be your data
fileno<-length(myfilenames)
filenamesplit<-unlist(strsplit(myfilenames[1], " "))
plateID<-vector()
for (i in 1:fileno){
filenamesplit<-unlist(strsplit(myfilenames[i], " "))
plateID<-c(plateID, filenamesplit[1])
}

platelist<-unique(plateID)
plateno<-length(platelist)
alltimepoints<-fileno/plateno
timepoints<-trunc(alltimepoints)
halfpoint<-trunc(timepoints/2)

for (i in 1:plateno){
dataPLATE<-data.frame(nrow=5000)
platefilelist<-list.files(pattern=platelist[i])
platefileinfo<-file.info(platefilelist)
myplatenames<-row.names(platefileinfo)
```



```

platetimepoints<-length(myplatenames)
for (j in 1:timepoints){
dataPLATE <-cbind(dataPLATE, read.delim(myplatenames[j], header=FALSE))
}
dataPLATE<-dataPLATE[,-1]
platedatafile<- paste(platelist[i],"raw.txt", sep="")
write.table (dataPLATE[row.first:row.last,1:timepoints],platedatafile)
datatrim<-read.table(platedatafile)
row.names(datatrim)<-paste(platelist[i],Wells,sep="_")
platedatafile<- paste(platelist[i],"data.txt", sep="")
write.table (datatrim,platedatafile)
}

datafilelist<-list.files(pattern="data.txt")
datafileinfo<-file.info(datafilelist)
datafilenames<-row.names(datafileinfo)
datano<-length(datafilenames)

screendata<-data.frame()
for (i in 1:datano){
activeplate<-datafilenames[i]
screendata<-rbind(screendata,read.table(activeplate))
}

filetimes<-numeric()
for (i in 1:timepoints){rel.read.time<-difftime(myfileinfo$mtime[i],
myfileinfo$mtime[1], units="hours")
filetimes<-c(filetimes,rel.read.time)}

screendata<-rbind(screendata,filetimes)
write.table(screendata,("screendata.txt"), sep=",", quote=FALSE,
col.names=FALSE, row.names=TRUE)

screen.wells<-(datano*plate.wells)
plate.well<-row.names(screendata)
attach(screendata)
x<-unlist(screendata[(screen.wells+1),startpoint:timepoints])
clipx<- x[clippoint:(timepoints-startpoint)]

grayscale<-colorRampPalette(c(gray(0), gray(1)))
normcolor<-grayscale(64)
hotset<-colorRampPalette(c("black","blue", "green", "yellow", "orange",
"red"))
nonnormcolor<-hotset(32)

for (i in 1:plateno){
beginwell<-((plate.wells*(i-1))+1)
endwell<-(plate.wells*i)
png(paste(platelist[i],"normal.png"), width=large.size,
height=large.size)
heatmap(as.matrix(screendata[beginwell:endwell,startpoint:timepoints]),
Colv = NA, Rowv=NA, scale="row",main = paste(platelist[i],"norm",
time ->"),labRow = NULL, labCol = NULL, xlab = NULL , ylab = NULL, col
= normcolor, margin=c(1,0))
dev.off()
png(paste(platelist[i],"raw.png"), width=large.size, height=large.size)
heatmap(as.matrix(screendata[beginwell:endwell,startpoint:timepoints]),
Colv = NA, Rowv=NA, scale="none",main = paste(platelist[i],"raw",
time ->"),labRow = NULL, labCol = NULL, xlab = NULL , ylab = NULL, col
= nonnormcolor, margin=c(1,0))
dev.off()
}

#####

```

```

lincosdampdata<-matrix(nrow=screen.wells,ncol=11)
colnames(lincosdampdata)<-
c("plate_well","plate","well","baseline","amplitude","dampingrate","phase",
"period","phase.angle","sumsquares","slope")
ss.residuals<-numeric()
for (i in 1:screen.wells)
{roe<-unlist(screendata[i,startpoint:timepoints])
cliproe<-unlist(roe[clippoint:(timepoints-startpoint)])
trend.est<-((median(roe[startpoint:halfpoint])-
median(roe[halfpoint:(timepoints-startpoint)]))/(x[halfpoint]-
x[timepoints-startpoint]))
phase.est<-clipx[which.max(cliproe)]
baseline.est<-median(cliproe)
amp.est<-((max(cliproe)-min(cliproe))/2)
lincosdamp<- try(nls(roe~ baseline + amplitude*(exp(-
damp*x))*cos(2*pi*(x-phase)/period) + trend*x,
start=list(baseline=baseline.est, amplitude=amp.est, damp= damp.est,
phase=phase.est, period=period.est, trend=trend.est),
trace=TRUE, algorithm="port"),silent=TRUE
)
try(ss.residuals<-sum((residuals(lincosdamp))^2))
try(baseline<-summary(lincosdamp)$coef[1])
try(amplitude<- (summary(lincosdamp)$coef[2]))
try(dampingrate<-summary(lincosdamp)$coef[3])
try(phase<-summary(lincosdamp)$coef[4])
try(period<- (summary(lincosdamp)$coef[5]))
try(phase.angle<-(-2*pi*((period-phase)/period-trunc((period-
phase)/period))))
try(phase<-format(phase, digits=3))
try(period<-format(period, digits=4))
try(trend<- (summary(lincosdamp)$coef[6]))
thewell<-Wells[(i-(trunc(i/plate.wells)*plate.wells))]
theplate<-platelist[trunc((i-1)/plate.wells)+1]
try(lincosdampdata[i,]<-
cbind(plate.well[i],theplate,thewell,baseline,amplitude,dampingrate,pha
se,period,phase.angle,ss.residuals,trend))
}

write.table(lincosdampdata,paste(method,".txt"), sep=",", quote=FALSE,
row.names=FALSE)

detach(screendata)

```
